# Supplementary material for: Hydroxypropyl-β-Cyclodextrin-Based Helichrysum italicum Extracts: Antioxidant and Cosmeceutical Activity and Biocompatibility
Source: MDPI journal article supplement (doi:10.3390/antiox12040855), 2023-04-01
Supplement: s1 [file s1]

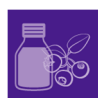

## Supplementary Materials

# Hydroxypropyl- $\beta$ -Cyclodextrin-Based *Helichrysum italicum* Extracts: Antioxidant, Cosmeceutical Activity and Biocompatibility with on HaCaT cells

Lejsa Jakupović<sup>1</sup>, Ivana Bačić<sup>2</sup>, Jasna Jablan<sup>3</sup>, Eva Marguí<sup>4</sup>, Marijan Marijan<sup>1</sup>, Suzana Inić<sup>3</sup>, Laura Nžić Nodilo<sup>5</sup>, Anita Hafner<sup>5</sup>, Marijana Zovko Končić<sup>1,\*</sup>

<sup>1</sup> Department of Pharmacognosy, University of Zagreb Faculty of Pharmacy and Biochemistry, A. Kovačića 1, 10000 Zagreb, Croatia

<sup>2</sup> Forensic Science Centre “Ivan Vučetić”, Ilica 335, 10000 Zagreb, Croatia

<sup>3</sup> Department of Analytical Chemistry, University of Zagreb Faculty of Pharmacy and Biochemistry, A. Kovačića 1, 10000 Zagreb, Croatia

<sup>4</sup> Department of Chemistry, Faculty of Sciences, University of Girona, C/ M. Aurèlia Capmany 69, 17003 Girona, Spain

<sup>5</sup> Department of Pharmaceutical Technology, University of Zagreb Faculty of Pharmacy and Biochemistry, A. Kovačića 1, 10000 Zagreb, Croatia

\* Correspondence: mzovko@pharma.hr

**Table S1.** Summary of the research conducted on hydroxypropyl- $\beta$ -cyclodextrin-assisted extraction and the resulting optimized extracts of *Helichrysum italicum*.

| Previously published results [10]*                                                                                                                                         | Results published in this work                                                                                                                                                                                   |
|----------------------------------------------------------------------------------------------------------------------------------------------------------------------------|------------------------------------------------------------------------------------------------------------------------------------------------------------------------------------------------------------------|
| <b>Extraction optimization</b>                                                                                                                                             |                                                                                                                                                                                                                  |
| Preliminary solvent selection<br>Preliminary extraction kinetics<br>Extraction according to the 2-level factorial design<br>Extraction according to the Box-Behnken design |                                                                                                                                                                                                                  |
| <b>Chemical analysis</b>                                                                                                                                                   |                                                                                                                                                                                                                  |
| TP, TF, and TPA for optimization purposes<br>TP and TF in OPT 2, TPA in OPT 1<br>LC-MS                                                                                     | Determination of metal content in plant material<br>TP and TF in OPT 1, TPA in OPT 2<br>GC-MS                                                                                                                    |
| <b>Antioxidant activity</b>                                                                                                                                                |                                                                                                                                                                                                                  |
|                                                                                                                                                                            | Radical scavenging activity<br>Antioxidant activity in $\beta$ -carotene-linoleic acid assay<br>reducing power                                                                                                   |
| <b>Cosmeceutical activity</b>                                                                                                                                              |                                                                                                                                                                                                                  |
| Elastase inhibitory activity<br>Collagenase inhibitory activity                                                                                                            | Hyaluronidase inhibitory activity<br>Tyrosinase inhibitory activity<br>Measurement of UVA and UVB absorbing capabilities<br>Lipoxygenase inhibitory activity<br>Inhibition of heat-induced ovalbumin coagulation |
| <b>Biocompatibility</b>                                                                                                                                                    |                                                                                                                                                                                                                  |
|                                                                                                                                                                            | Cell viability study on HaCaT cells                                                                                                                                                                              |

\* = for reference list, see the main text; TP = Total phenol content, TPA= Total phenolic acid content, TF = Total flavonoid content. Optimized extracts: OPT-1 (rich in phenolic acids) and OPT-2 (rich in total phenols and flavonoids).

**Table S2.** Volatile compounds in the *Helichrysum italicum* extracts as assessed by GC-MS analysis.

| No. | t <sub>R</sub> | Compound                                         | Content in OPT-1 (%) | Content in OPT-2 (%) |
|-----|----------------|--------------------------------------------------|----------------------|----------------------|
| 1   | 7.825          | $\alpha$ -Pinene                                 | 0.35                 | 0.23                 |
| 2   | 9.433          | $\alpha$ -Terpinene                              | 0.03                 | 0.03                 |
| 3   | 9.484          | <i>p</i> -Cymene                                 | 0.05                 | 0.02                 |
| 4   | 9.625          | Eucalyptol                                       | 0.11                 | 0.07                 |
| 5   | 9.658          | D-Limonene                                       | 0.10                 | 0.06                 |
| 6   | 10.170         | $\gamma$ -Terpinene                              | 0.01                 | 0.01                 |
| 7   | 10.650         | Cyclooctanone                                    | -                    | 0.05                 |
| 8   | 10.708         | $\alpha$ -Terpinolene                            | 0.04                 | 0.001                |
| 9   | 10.792         | Linalool                                         | 0.78                 | 0.47                 |
| 10  | 11.033         | Fenchol                                          | 0.07                 | 0.03                 |
| 11  | 11.392         | Camphor (2-Bornanone)                            | 0.07                 | 0.02                 |
| 12  | 11.442         | L-Pinocarveol                                    | 0.07                 | 0.03                 |
| 13  | 11.675         | 2-methylbutyl angelate                           | 0.08                 | 0.04                 |
| 14  | 11.700         | Nerol oxyide                                     | 0.08                 | 0.01                 |
| 15  | 11.867         | Endo-Borneol (Camphol)                           | 0.19                 | 0.07                 |
| 16  | 12.033         | 4,6-dimethyloctane-3,5-dione                     | 0.16                 | 0.10                 |
| 17  | 12.075         | 4-Terpineol                                      | 0.34                 | 0.16                 |
| 18  | 12.242         | $\alpha$ -Terpineol                              | 0.35                 | 0.15                 |
| 19  | 12.825         | Nerol (geraniol)                                 | 0.94                 | 0.64                 |
| 20  | 13.267         | Linalylacetate                                   | 0.08                 | 0.07                 |
| 21  | 13.767         | 4-Hydroxy-3-methylacetophenone                   | 0.27                 | 0.17                 |
| 22  | 14.725         | Neryl acetate                                    | 2.75                 | 2.18                 |
| 23  | 15.100         | $\alpha$ -Muurolene                              | 0.11                 | 0.07                 |
| 24  | 15.217         | $\alpha$ -Copaene                                | 0.12                 | 0.10                 |
| 25  | 15.592         | $\beta$ -Curcumene                               | 0.11                 | 0.08                 |
| 26  | 15.675         | trans- $\alpha$ -Bergamotene                     | 0.06                 | 0.04                 |
| 27  | 15.717         | 4,6,9-Trimethyldec-8-en-3,5-dione (italidione I) | 1.23                 | 0.70                 |
| 28  | 15.775         | $\beta$ -Caryophyllene                           | 0.58                 | 0.33                 |
| 29  | 15.908         | Neryl propionate                                 | 0.56                 | 0.35                 |
| 30  | 15.950         | cis- $\alpha$ -Bergamotene                       | 0.32                 | 0.18                 |
| 31  | 16.065         | <i>n.i.</i>                                      | 1.14                 | 1.36                 |
| 32  | 16.208         | Humulene                                         | 0.49                 | 0.04                 |
| 33  | 16.317         | 2,4,6,9-tetramethyldec-8-en-3,5-dione            | 0.89                 | 0.57                 |
| 34  | 16.425         | $\alpha$ -Curcumene                              | 0.96                 | 0.56                 |
| 35  | 16.450         | $\gamma$ -Curcumene                              | 1.17                 | 1.22                 |
| 36  | 16.550         | $\beta$ -Sesquisabinene                          | 0.07                 | 0.10                 |
| 37  | 16.600         | $\beta$ -Selinene                                | 2.02                 | 1.46                 |
| 38  | 16.723         | $\gamma$ -Selinene                               | 0.74                 | 0.46                 |
| 39  | 16.992         | D-Cadinene                                       | 0.33                 | 0.14                 |
| 40  | 17.276         | Dodecanoic acid (lauric acid)                    | 0.17                 | 0.26                 |
| 41  | 17.692         | Caryophyllene oxide                              | 0.43                 | 0.37                 |

|    |        |                                                                                                              |      |      |
|----|--------|--------------------------------------------------------------------------------------------------------------|------|------|
| 42 | 17.842 | Guaiol                                                                                                       | 0.13 | 0.09 |
| 43 | 17.958 | (1S,3 $\alpha$ S,4S,5S,7 $\alpha$ R,8R)-5-Isopropyl-1,7 $\alpha$ -dimethyloctahydro-1H-1,4-methanoinden-8-ol | 1.47 | 1.11 |
| 44 | 18.317 | t-Cadinol                                                                                                    | 0.48 | 0.34 |
| 45 | 18.475 | Neointermedeol                                                                                               | 1.86 | 1.34 |
| 46 | 18.635 | Iso- $\beta$ -bisabolol                                                                                      | 0.84 | 0.62 |
| 47 | 18.775 | $\alpha$ -Bisabolol                                                                                          | 0.47 | 0.47 |
| 48 | 19.042 | Tremeton                                                                                                     | 0.88 | 0.33 |
| 49 | 19.542 | Tetradecanoic acid (myristic acid)                                                                           | 0.44 | 0.66 |
| 50 | 19.792 | <i>n.i.</i> (fatty acid ester)                                                                               | -    | 0.87 |
| 51 | 19.867 | <i>n.i.</i> (fatty acid ester)                                                                               | 0.14 | 0.57 |
| 52 | 21.608 | Hexadecanoic acid (palmitic acid)                                                                            | 0.35 | 0.76 |
| 53 | 22.717 | <i>n.i.</i>                                                                                                  | 7.95 | 4.78 |
| 54 | 23.600 | <i>n.i.</i>                                                                                                  | 9.20 | 6.02 |
| 55 | 24.000 | <i>n.i.</i>                                                                                                  | 3.12 | 2.2  |
| 56 | 24.800 | <i>n.i.</i>                                                                                                  | 1.59 | 1.76 |
| 57 | 27.158 | <i>n.i.</i>                                                                                                  | 2.64 | 6.45 |
| 58 | 32.583 | Campesterol                                                                                                  | 0.54 | 0.53 |
| 59 | 32.975 | Stigmasterol                                                                                                 | 0.57 | 0.73 |
| 60 | 33.758 | $\gamma$ -Sitosterol                                                                                         | 1.61 | 2.03 |

*n.i.* = not identified.
